# Supplementary material for: Detection of malignant peripheral nerve sheath tumors in patients with neurofibromatosis using aneuploidy and mutation identification in plasma
Source: medRxiv preprint, doi:10.1101/2021.09.09.21262860, version 1 (2021-09-14)
Supplement: Supplemental Table 2 [file 262860_file03.xlsx]

## Sheet: S2. Patients
Patient ID	Sample ID	Histological Diagnosis at Time of Blood Draw	NF Status	Radiographic Tumor Size (cm3)	Tumor Location	Imaging Characteristics	Prior Treatment	Alive/Deceased	GAS Score	Mutation	Mutant Allele Fraction Plasma (ddPCR)	Other Notes
GLIA 405	GLIA_405_PLS_1	Plexiform Neurofibroma	NF1	48	Scalp	CT enhancement	None	Alive	0.0608888	Not assayed	Not assayed	N/A
GLIA 406	GLIA_406_PLS_1	Plexiform Neurofibroma	NF1	132.3	Left femoral nerve	N/A	None	Alive	0.00421027	Not assayed	Not assayed	N/A
GLIA 407	GLIA_407_PLS_1	Neurofibroma	NF1	N/A	Left cheek	N/A	Chemotherapy (trametinib)	Alive	0.00046016	Not assayed	Not assayed	N/A
GLIA 408	GLIA_408_PLS_1	Neurofibroma	NF1	N/A	Cervical spine	N/A	None	Alive	0.000422905	Not assayed	Not assayed	N/A
GLIA 409	GLIA_409_PLS_1	Neurofibroma	NF1	215.7	Infraclavicular brachial plexus	N/A	None	Alive	0.00277296	Not assayed	Not assayed	N/A
GLIA 410	GLIA_410_PLS_1	Plexiform Neurofibroma	NF1	1.43	Right groin	CT enhancement	None	Alive	0.0359007	Not assayed	Not assayed	N/A
GLIA 411	GLIA_411_PLS_1	MPNST	NF1	66	Thoracic spine	CT enhancement	None	Deceased	0.243388	Not assayed	Not assayed	N/A
GLIA 412	GLIA_412_PLS_1	Plexiform Neurofibroma	NF1	43.22	Left iliac region, left paraspinal region, right plank, right distal biceps	N/A	None	Alive	0.0166399	Not assayed	Not assayed	N/A
GLIA 413	GLIA_413_PLS_1	Neurofibroma	NF1	N/A	Not imaged	Not imaged	None	Alive	0.0190229	Not assayed	Not assayed	N/A
GLIA 414	GLIA_414_PLS_1	Plexiform Neurofibroma	NF1	2.21	Left Leg (below knee)	N/A	None	Alive	0.00105502	Not assayed	Not assayed	N/A
GLIA 415	GLIA_415_PLS_1	Plexiform Neurofibroma	NF1	2.25	Left Thigh	Not imaged	None	Alive	0.00196192	Not assayed	Not assayed	N/A
GLIA 416	GLIA_416_PLS_1	MPNST	NF1	1.76	Left posterior thigh	N/A	Chemotherapy (iosfamide, doxorubicin, etoposide, VIT and metformin, vincristine ironotecan, temozolomide), neoadjuvant proton radiation therapy	Alive	0.00385906	Not assayed	Not assayed	N/A
GLIA 417	GLIA_417_PLS_1	Plexiform Neurofibroma	NF1	688.5	Bladder	CT enhancement	None	Alive	0.232443	Not assayed	Not assayed	N/A
GLIA 418	GLIA_418_PLS_1	MPNST	NF1	19.425	Back	CT enhancement	Surgery	Alive	0.00745667	Not assayed	Not assayed	N/A
INDIA 1244	INDIA_1244_PLS_1	MPNST	NF1	2070.6	Thoracic spine	CT enhancement, PET positive	Chemotherapy (mesna, adriamycin, ifosfamide)	Unknown	0.850282	RB1 R787Qfs*23	0.0255	N/A
INDIA 1248	INDIA_1248_PLS_1	MPNST	NF1	Previously resected	Left femoral nerve	PET positive	Surgery	Unknown	0.00367422	NF2 R341X	Not detected	N/A
INDIA 1256	INDIA_1256_PLS_1	Neurofibroma	NF1	Previously resected	Thoracic and sacral spine	N/A	Surgery	Unknown	0.00243827	NF1 L2738*	Not detected	N/A
INDIA 1264	INDIA_1264_PLS_1	Plexiform Neurofibroma	NF1	800.8	Cervical and thoracic spine	CT enhancement	None	Alive	0.151669	Not assayed	Not assayed	N/A
INDIA 1280	INDIA_1280_PLS_1	Neurofibroma	NF1	43.2	Right femoral nerve	N/A	Surgery	Alive	0.0055343	GOLGA2 Splice Site Acceptor	0.0019	N/A
INDIA 1281	INDIA_1281_PLS_1	MPNST	NF1	1368.9	Abdomen	PET positive	Chemotherapy	Deceased	0.0255202	TP53BP2 A324V	0.0004	N/A
INDIA 1283	INDIA_1283_PLS_1	Plexiform Neurofibroma	NF1	69.174	Lumbar spine	N/A	Surgery	Alive	0.996623	Not assayed	Not assayed	Progressed to MPNST 25 months after blood draw
INDIA 1285	INDIA_1285_PLS_1	MPNST	NF1	699.952	Thoracic spine	PET positive	Surgery, chemotherapy (serolinus), neoadjuvant radiotherapy	Alive	0.00184969	Not assayed	Not assayed	N/A
INDIA 1287	INDIA_1287_PLS_1	Neurofibroma	Not NF	6.384	Brachialis muscle	N/A	None	Alive	0.00295788	Not assayed	Not assayed	N/A
INDIA 1294	INDIA_1294_PLS_1	MPNST	NF1	N/A	Thoracic spine	PET positive	Radiation	Unknown	0.0140128	Not assayed	Not assayed	N/A
INDIA 1296	INDIA_1296_PLS_1	MPNST	NF1	22.98	Thoracic spine	N/A	None	Alive	0.00314773	NHLH2 L95X	Not detected	N/A
INDIA 1297	INDIA_1297_PLS_1	MPNST	NF1	268.84	Right femoral nerve	N/A	Chemotherapy, radiation	Deceased	0.303007	Not assayed	Not assayed	N/A
INDIA 1298	INDIA_1298_PLS_1	MPNST	NF1	127.204	Left foot	PET positive	None	Deceased	0.999809	Not assayed	Not assayed	N/A
INDIA 1304	INDIA_1304_PLS_1	MPNST	NF1	426.904	Sacral spine	PET positive	None	Unknown	0.0225217	Not assayed	Not assayed	N/A
