# Supplementary material for: Detection of malignant peripheral nerve sheath tumors in patients with neurofibromatosis using aneuploidy and mutation identification in plasma
Source: medRxiv preprint, doi:10.1101/2021.09.09.21262860, version 1 (2021-09-14)
Supplement: Supplemental Table 4 [file 262860_file05.xlsx]

## Sheet: S4. Focal Annotations
Patient ID	Sample ID	Histological Diagnosis at Time of Blood Draw	GAS	4q_PDGFRA	5p_TERT	6q_TBX1	7p_EGFR	7q_BRAF	8q_EXT1	9p_CDKN2A_B	10q_PTEN	11p_EXT2	11q_EED	15q_IDH2	17p_TP53	17q_NF1_SUZ12
GLIA 405	GLIA_405_PLS_1	Plexiform Neurofibroma	0.0608888	-	-	-	-	-	-	-	-	-	-	-	-	-
GLIA 406	GLIA_406_PLS_1	Plexiform Neurofibroma	0.00421027	-	-	-	-	-	-	-	-	-	-	-	-	-
GLIA 407	GLIA_407_PLS_1	Neurofibroma	0.00046016	-	-	-	-	-	-	-	-	-	-	-	-	-
GLIA 408	GLIA_408_PLS_1	Neurofibroma	0.000422905	-	-	-	-	-	-	-	-	-	-	-	-	-
GLIA 409	GLIA_409_PLS_1	Neurofibroma	0.00277296	-	-	-	-	-	-	-	-	-	-	-	-	-
GLIA 410	GLIA_410_PLS_1	Plexiform Neurofibroma	0.0359007	-	-	-	-	-	-	-	-	-	-	-	-	-
GLIA 411	GLIA_411_PLS_1	MPNST	0.243388	-	-	-	-	-	-	-	-	-	-	-	-	Yes
GLIA 412	GLIA_412_PLS_1	Plexiform Neurofibroma	0.0166399	-	-	-	-	-	-	-	-	-	-	-	-	-
GLIA 413	GLIA_413_PLS_1	Neurofibroma	0.0190229	-	-	-	-	-	-	-	-	-	-	-	-	Yes
GLIA 414	GLIA_414_PLS_1	Plexiform Neurofibroma	0.00105502	-	-	-	-	-	-	-	-	-	-	-	-	-
GLIA 415	GLIA_415_PLS_1	Plexiform Neurofibroma	0.00196192	-	-	-	-	-	-	-	-	-	-	-	-	-
GLIA 416	GLIA_416_PLS_1	MPNST	0.00385906	-	-	-	-	-	-	-	-	-	-	-	-	-
GLIA 417	GLIA_417_PLS_1	Plexiform Neurofibroma	0.232443	-	-	-	-	-	-	-	-	-	-	-	-	-
GLIA 418	GLIA_418_PLS_1	MPNST	0.00745667	-	-	-	-	-	-	-	-	-	-	-	-	-
INDIA 1244	INDIA_1244_PLS_1	MPNST	0.850282	-	-	-	-	-	-	-	-	-	-	-	-	Yes
INDIA 1248	INDIA_1248_PLS_1	MPNST	0.00367422	-	-	-	-	-	-	-	-	-	-	-	-	-
INDIA 1256	INDIA_1256_PLS_1	Neurofibroma	0.00243827	-	-	-	-	-	-	-	-	-	-	-	-	-
INDIA 1264	INDIA_1264_PLS_1	Plexiform Neurofibroma	0.151669	-	-	-	-	-	-	-	-	-	-	-	-	Yes
INDIA 1280	INDIA_1280_PLS_1	Neurofibroma	0.0055343	-	-	-	-	-	-	-	-	-	-	-	-	-
INDIA 1281	INDIA_1281_PLS_1	MPNST	0.0255202	-	-	-	-	-	-	-	-	-	-	-	-	Yes
INDIA 1283	INDIA_1283_PLS_1	Plexiform Neurofibroma	0.996623	-	Yes	-	-	-	-	-	-	-	-	-	-	-
INDIA 1285	INDIA_1285_PLS_1	MPNST	0.00184969	-	-	-	-	-	-	-	-	-	-	-	-	-
INDIA 1287	INDIA_1287_PLS_1	Neurofibroma	0.00295788	-	-	-	-	-	-	-	-	-	-	-	-	-
INDIA 1294	INDIA_1294_PLS_1	MPNST	0.0140128	-	-	-	-	-	-	-	-	-	-	-	-	-
INDIA 1296	INDIA_1296_PLS_1	MPNST	0.00314773	-	-	-	-	-	-	-	-	-	-	-	-	-
INDIA 1297	INDIA_1297_PLS_1	MPNST	0.303007	-	-	-	-	-	-	-	-	-	-	-	-	Yes
INDIA 1298	INDIA_1298_PLS_1	MPNST	0.999809	-	Yes	-	-	-	-	-	-	-	-	-	Yes	Yes
INDIA 1304	INDIA_1304_PLS_1	MPNST	0.0225217	-	Yes	-	-	-	-	-	-	-	-	-	-	Yes
